# Supplementary material for: FTIR spectrum analysis to predict the crystalline and amorphous phases of hydroxyapatite: a comparison of vibrational motion to reflection
Source: Royal Society of Chemistry journal article supplement (doi:10.1039/d3ra02580b), 2023-01-01
Supplement: d3ra02580b1.pdf [file d3ra02580b1.pdf]

## FTIR spectrum analysis to predict the crystalline and amorphous phases of hydroxyapatite: A comparison of vibrational motion to reflection

Md. Sahadat Hossain<sup>a</sup> and Samina Ahmed<sup>a,b\*</sup>

<sup>a</sup>*Institute of Glass & Ceramic Research and Testing, Bangladesh Council of Scientific and Industrial Research (BCSIR), Dhaka-1205, Bangladesh.*

<sup>b</sup>*BCSIR Laboratories Dhaka, Bangladesh Council of Scientific and Industrial Research (BCSIR), Dhaka-1205, Bangladesh*

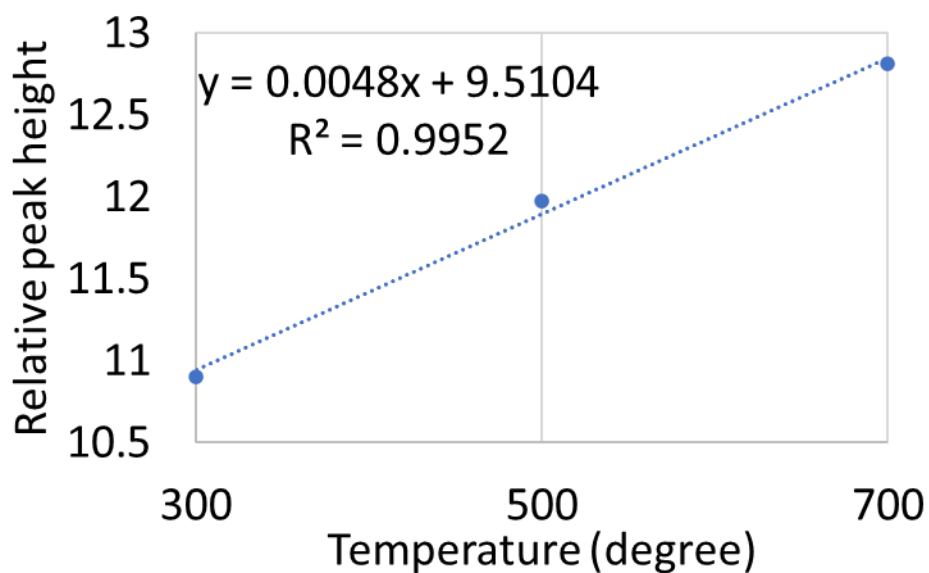

Figure S-1: Relation between temperature and relative peak height within the range of 300-700°C for 563  $\text{cm}^{-1}$  wavenumber

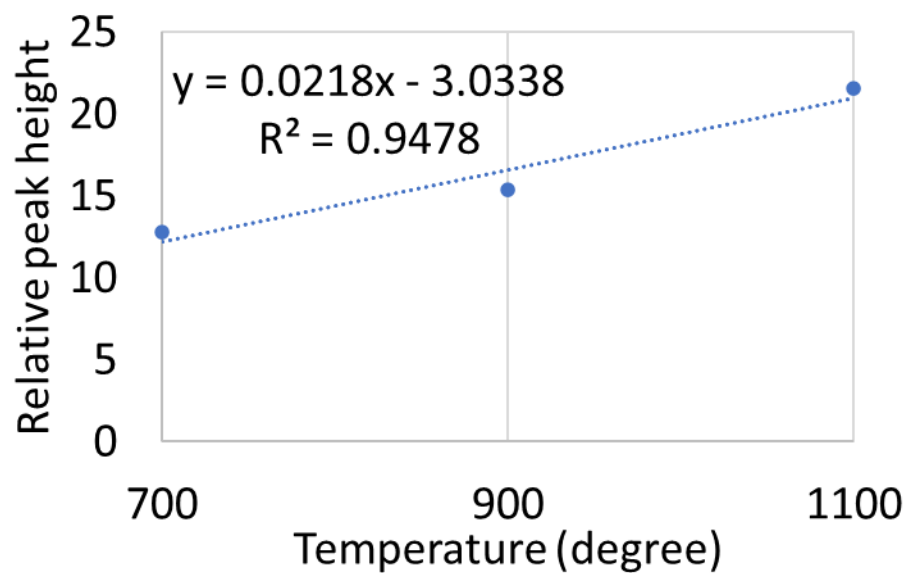

Figure S-2: Relation between temperature and relative peak height within the range of 700-1100°C for 563 cm<sup>-1</sup> wavenumber

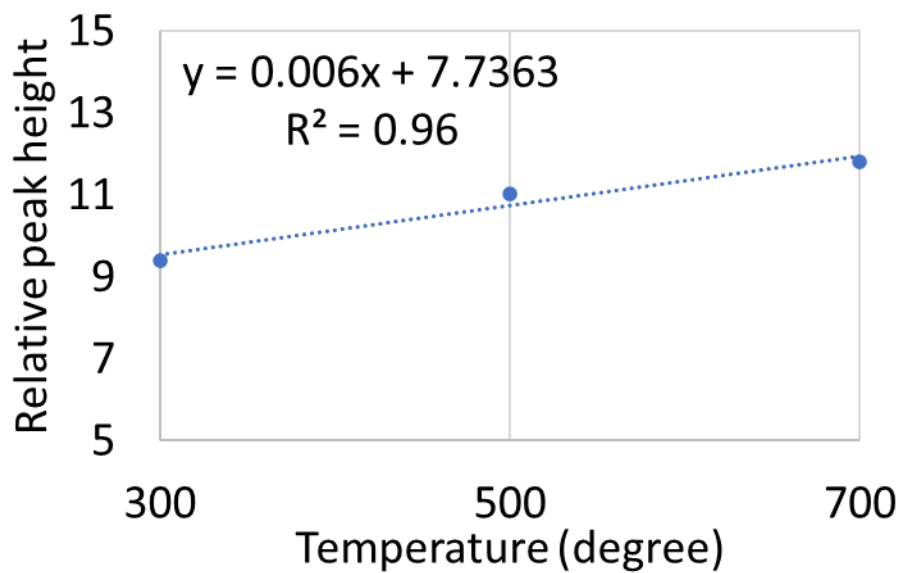

Figure S-3: Relation between temperature and relative peak height within the range of 300-700°C for 599 cm<sup>-1</sup> wavenumber

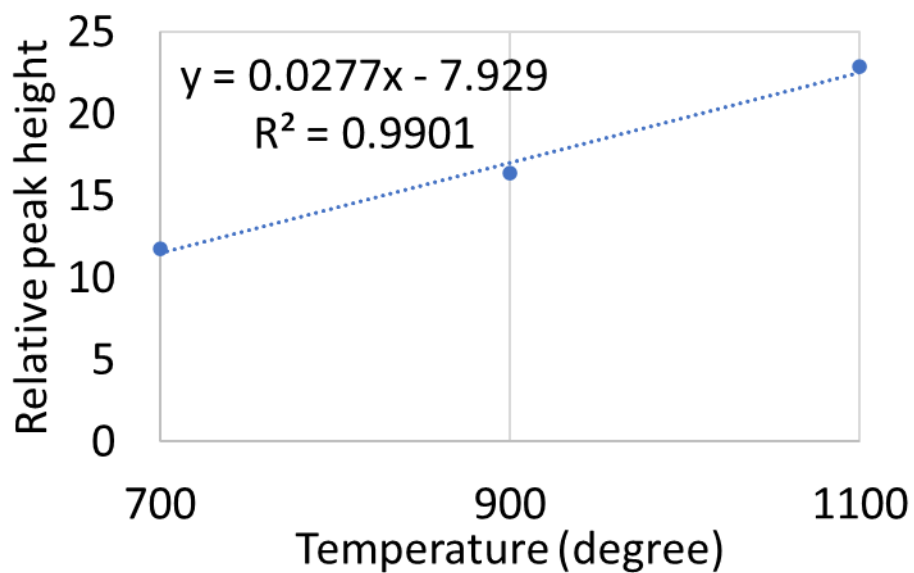

Figure S-4: Relation between temperature and relative peak height within the range of 700-1100°C for 599 cm<sup>-1</sup> wavenumber

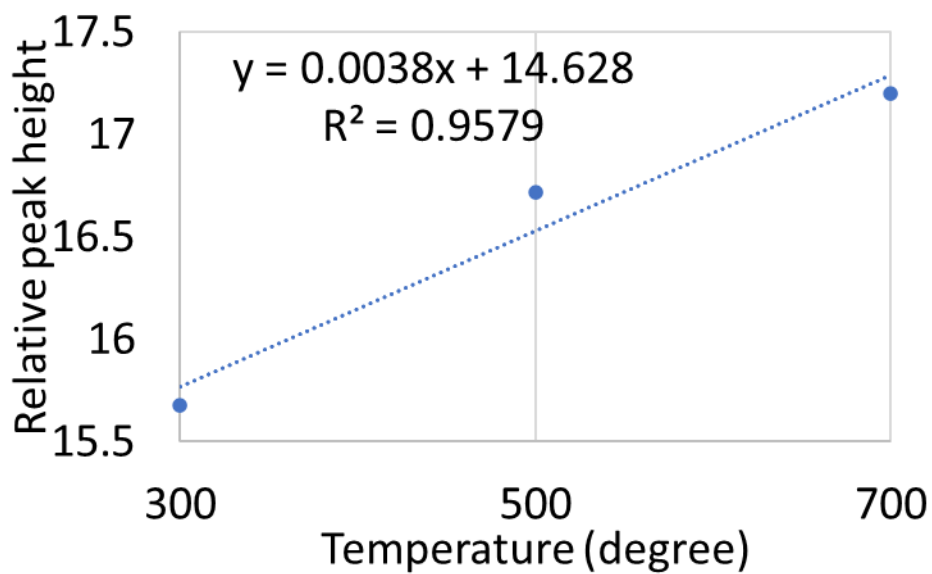

Figure S-5: Relation between temperature and relative peak height within the range of 300-700°C for 962 cm<sup>-1</sup> wavenumber

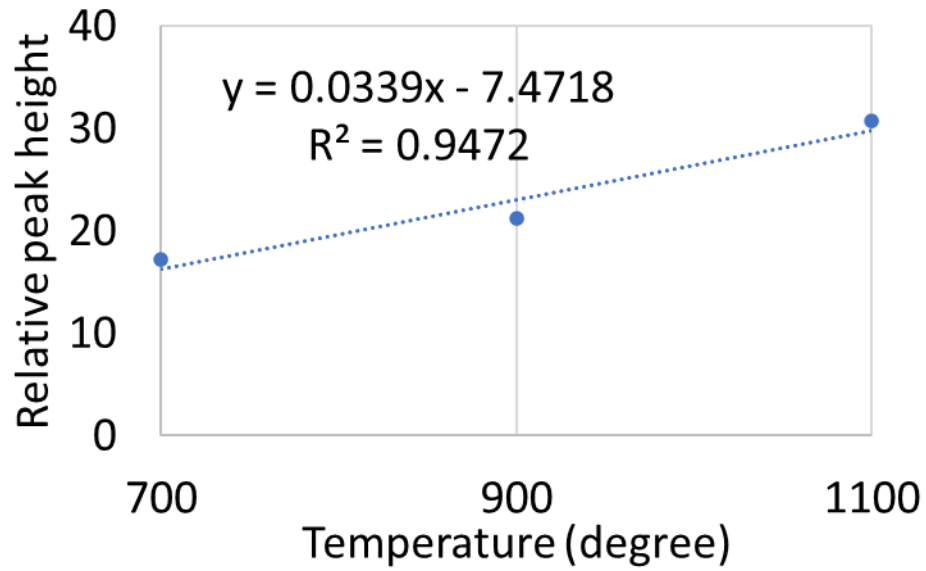

Figure S-6: Relation between temperature and relative peak height within the range of 700-1100°C for 962 cm<sup>-1</sup> wavenumber

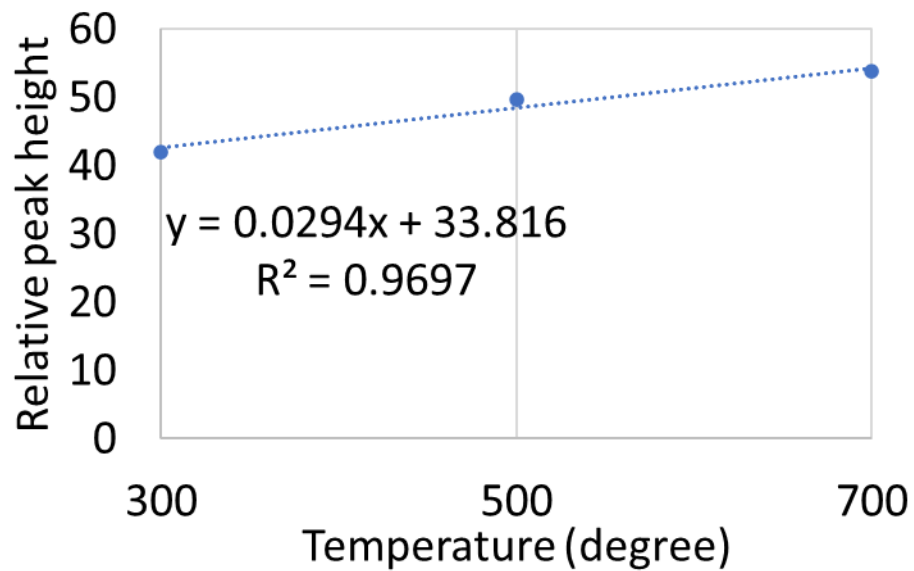

Figure S-7: Relation between temperature and relative peak height within the range of 300-700°C for 1026 cm<sup>-1</sup> wavenumber

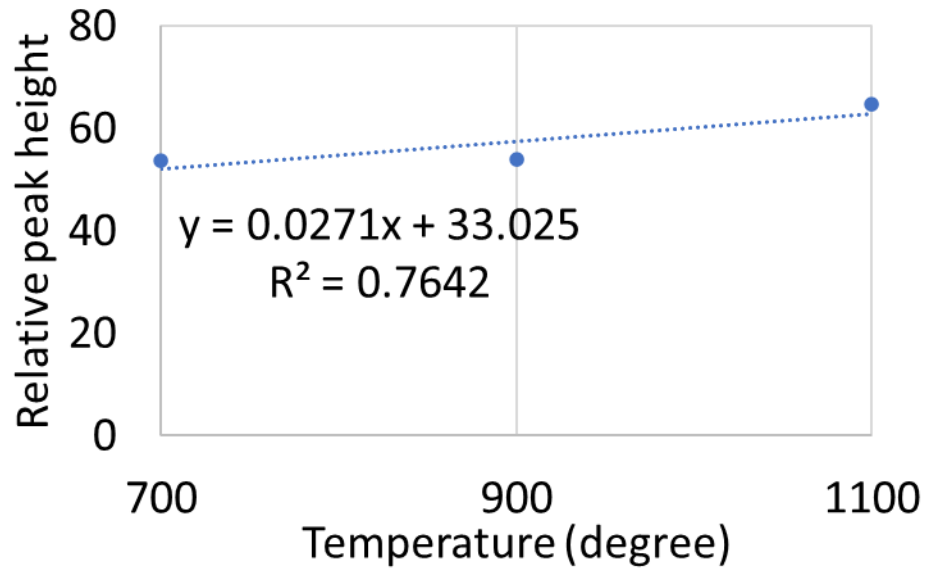

Figure S-8: Relation between temperature and relative peak height within the range of 700-1100°C for 1026  $\text{cm}^{-1}$  wavenumber

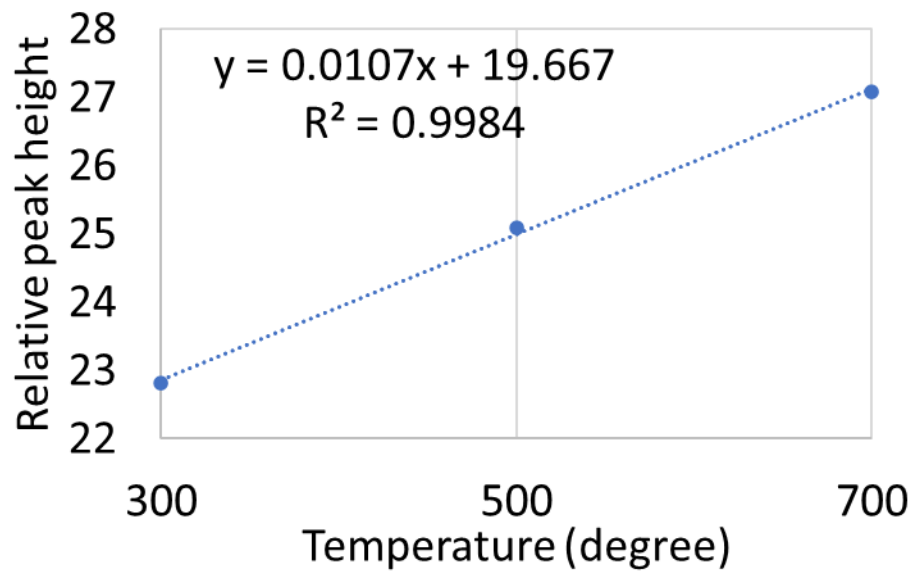

Figure S-9: Relation between temperature and relative peak height within the range of 300-700°C for 1087  $\text{cm}^{-1}$  wavenumber

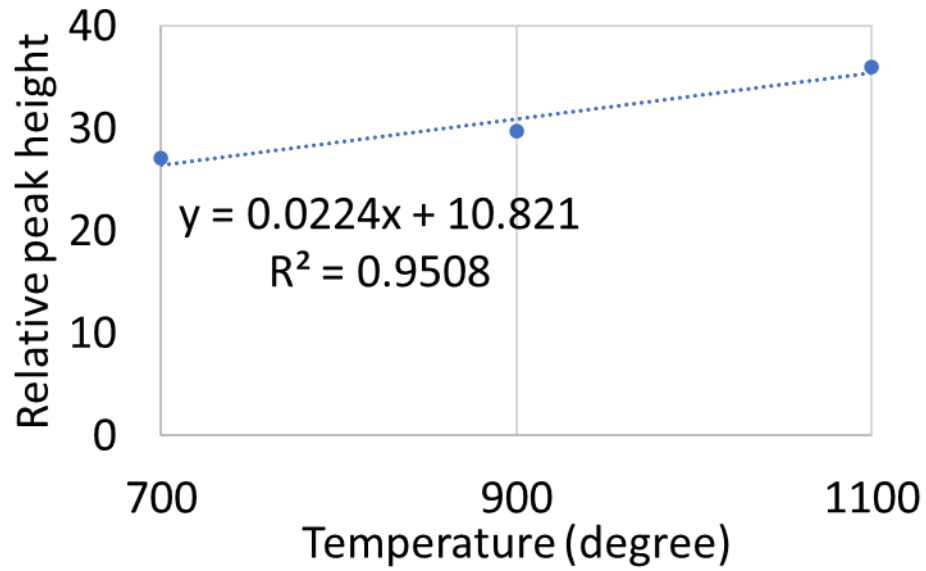

Figure S-10: Relation between temperature and relative peak height within the range of 700-1100°C for 1087  $\text{cm}^{-1}$  wavenumber

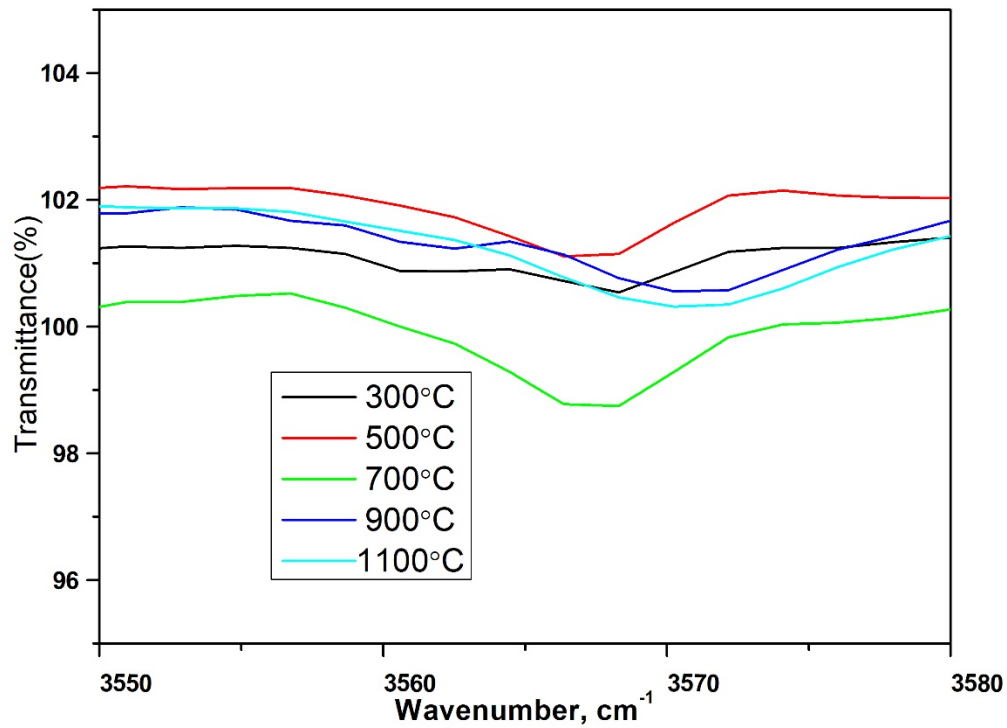

Figure S\_11: Relation between temperature and relative peak height within the range of 700-1100°C for 3568  $\text{cm}^{-1}$  wavenumber

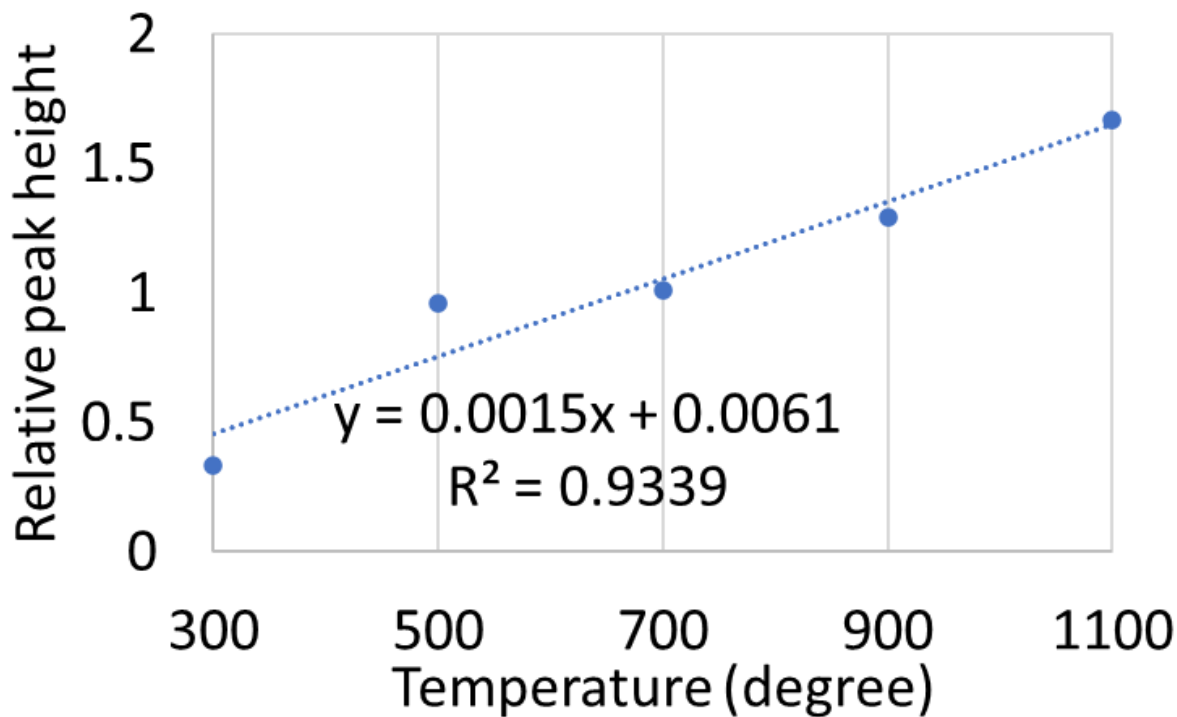

Figure S-12: Relation between temperature and relative peak height within the range of 300-1100°C for 3568 cm<sup>-1</sup> wavenumber

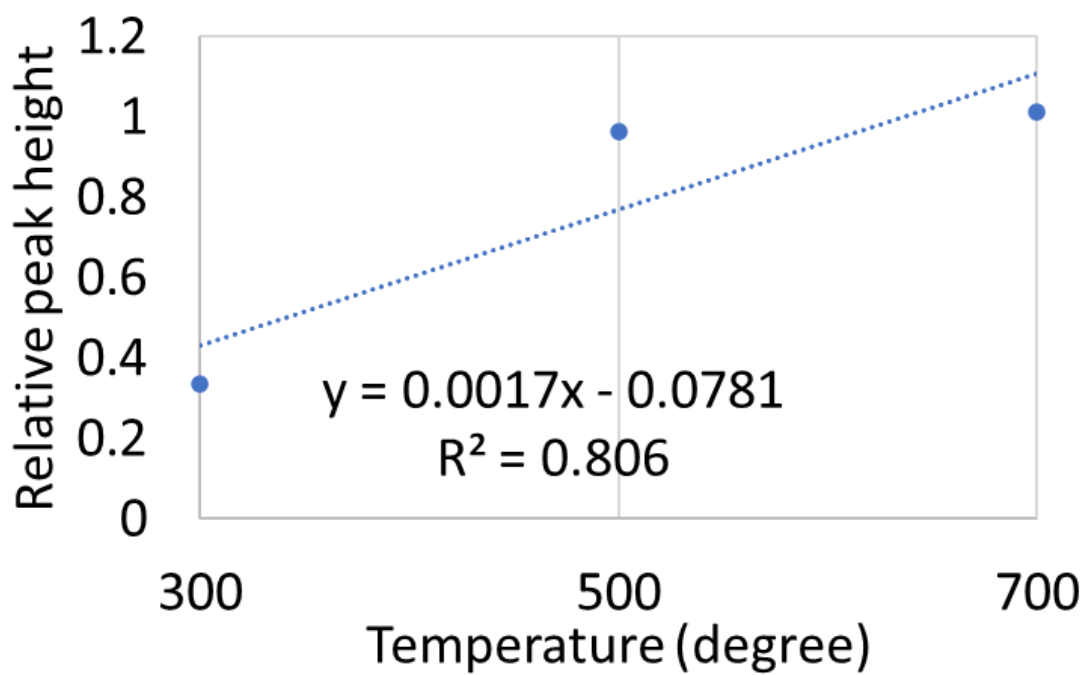

Figure S-13: Relation between temperature and relative peak height within the range of 300-700°C for 3568 cm<sup>-1</sup> wavenumber

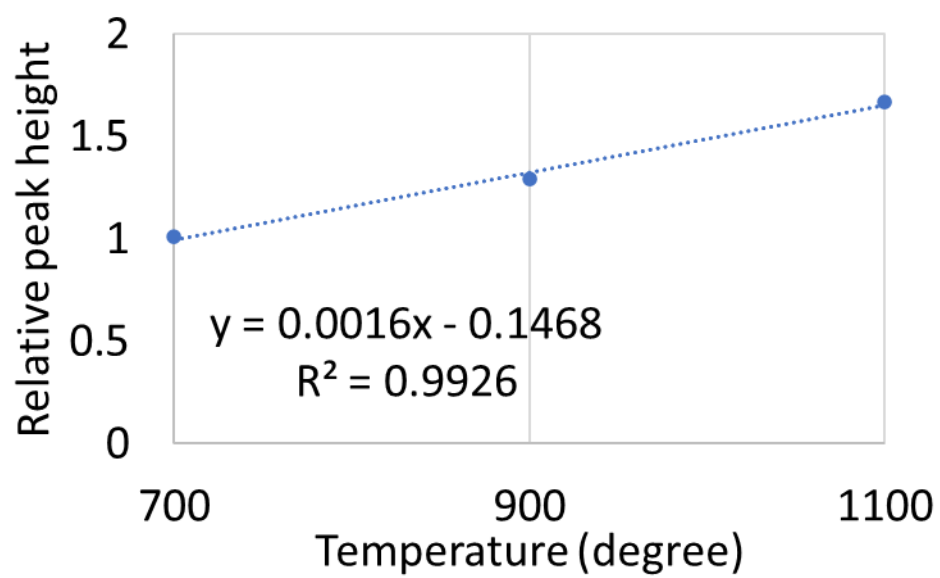

Figure S-14: Relation between temperature and relative peak height within the range of 700-1100°C for 3568 cm<sup>-1</sup> wavenumber
